# Supplementary material for: Cross-disease analysis of Alzheimer’s disease and type-2 Diabetes highlights the role of autophagy in the pathophysiology of two highly comorbid diseases
Source: PubMed Central journal article supplement (PMC6408545; doi:10.1038/s41598-019-39828-5), 2019-03-08
Supplement: 41598_2019_39828_MOESM1_ESM.pdf [file 41598_2019_39828_MOESM1_ESM.pdf]

Laura Caberlotto, T.-Phuong Nguyen, Mario Lauria, Corrado Priami, Roberto Rimondini, Silvia Maioli, Angel Cedazo-Minguez, Giulia Sita, Fabiana Morroni, Mauro Corsi, Lucia Carboni.

**Cross-disease analysis of Alzheimer's disease and type-2 diabetes highlights the role of autophagy in the pathophysiology of two highly comorbid diseases**

Supplementary Figure 1.

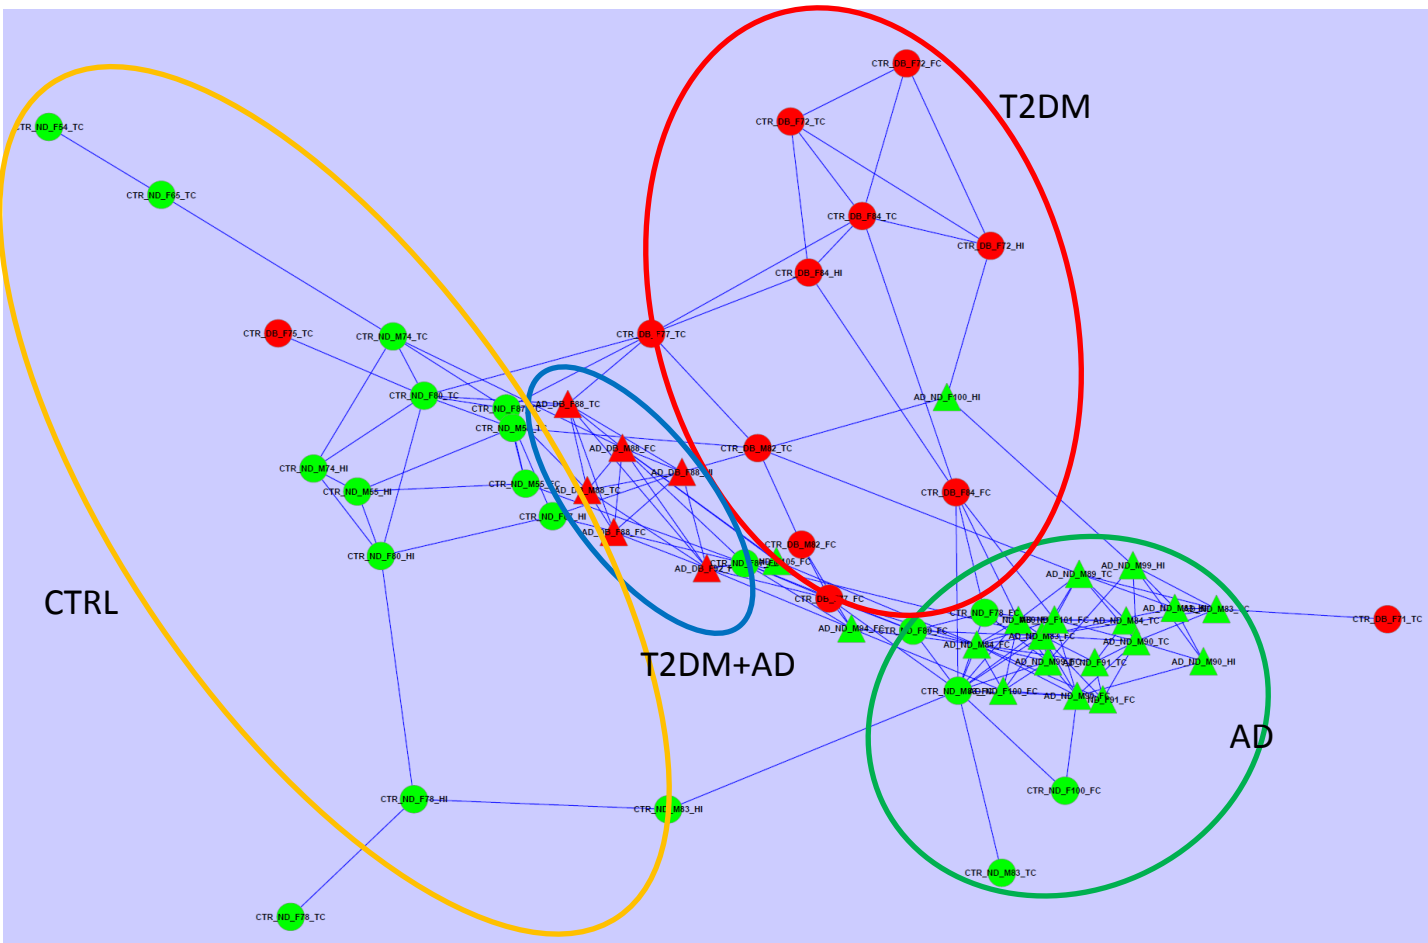

**Supplementary Figure 1.** Map of profiles according to their transcriptional signature similarity. The map is in the form of a graph where the nodes correspond to profiles and the length of a connecting edge encodes the level of similarity between the connected nodes (short edge = high similarity; no edge = negligible similarity). The SCUDO method was used to perform a 4-way classification based on the following four groups: T2DM controls, non-T2DM controls, T2DM AD, and non-T2DM AD subjects. Legend: *red*: T2DM, *green*: non-T2DM; *triangles*: AD subjects; *circles*: non-AD subjects.
